# Supplementary material for: Metastasis-related long non-coding RNAs AL359220.1, SH3BP5-AS1 and ZF-AS1 are significant for prognostic assessment of lung adenocarcinoma
Source: publisher site journal article supplement (doi:10.18632/aging.204923), 2023-08-10
Supplement: Supplementary file [file aging-v15i15-204923-supplementary-material-SD1.pdf]

## SUPPLEMENTARY TABLE

Supplementary Table 1. Basic clinical characteristic information of LUAD patients from TCGA.

| Characteristic |              | TCGA      |
|----------------|--------------|-----------|
| Age            | <65          | 203 (45%) |
|                | ≥65          | 253 (55%) |
| Gender         | FEMALE       | 248 (54%) |
|                | MALE         | 208 (46%) |
| Stage          | Stage I-II   | 356 (78%) |
|                | Stage III-IV | 100 (22%) |
| T stage        | T1-2         | 397 (87%) |
|                | T3-4         | 59 (13%)  |
| N stage        | N0           | 304 (67%) |
|                | N1-3         | 152 (33%) |
| M stage        | M0           | 435 (95%) |
|                | M1           | 21 (5%)   |
